# Supplementary material for: A Thai Traditional Triple-Fruit Formulation “Phikud Tri-Phon” May Provide Fat Loss and Nutritional Benefits
Source: MDPI journal article supplement (doi:10.3390/foods11193067), 2022-10-02
Supplement: s1 [file s1]

## Supplementary data

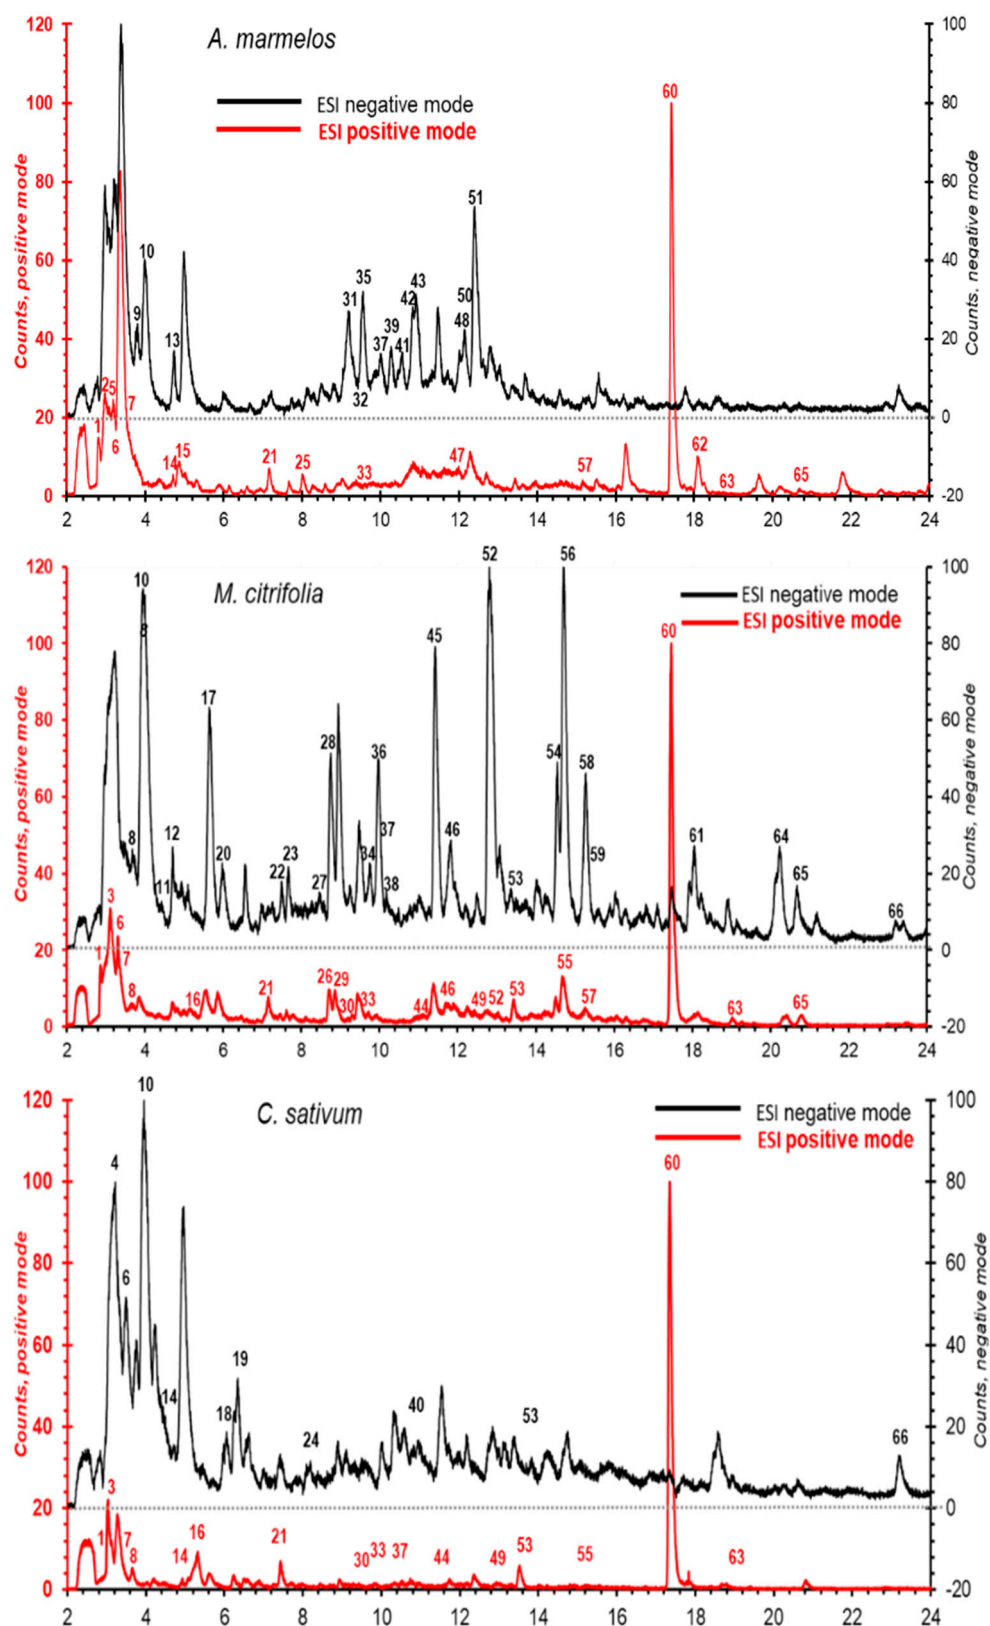

**Figure S1.** Total ion chromatogram of 10 mg/mL aqueous extract of *A. marmelos* (A), *M. citrifolia* (M), and *C. sativum* (C) by LC/MS operated in ESI negative mode and in ESI positive mode. The characteristics of each peak are in Table 3.
